# Supplementary material for: Does genetic predisposition modify the effect of lifestyle-related factors on DNA methylation?
Source: bioRxiv or medRxiv preprint supplement (doi:10.1101/2021.10.18.21265181), 2021-10-22
Supplement: Supplementary file [file media-2.pdf]

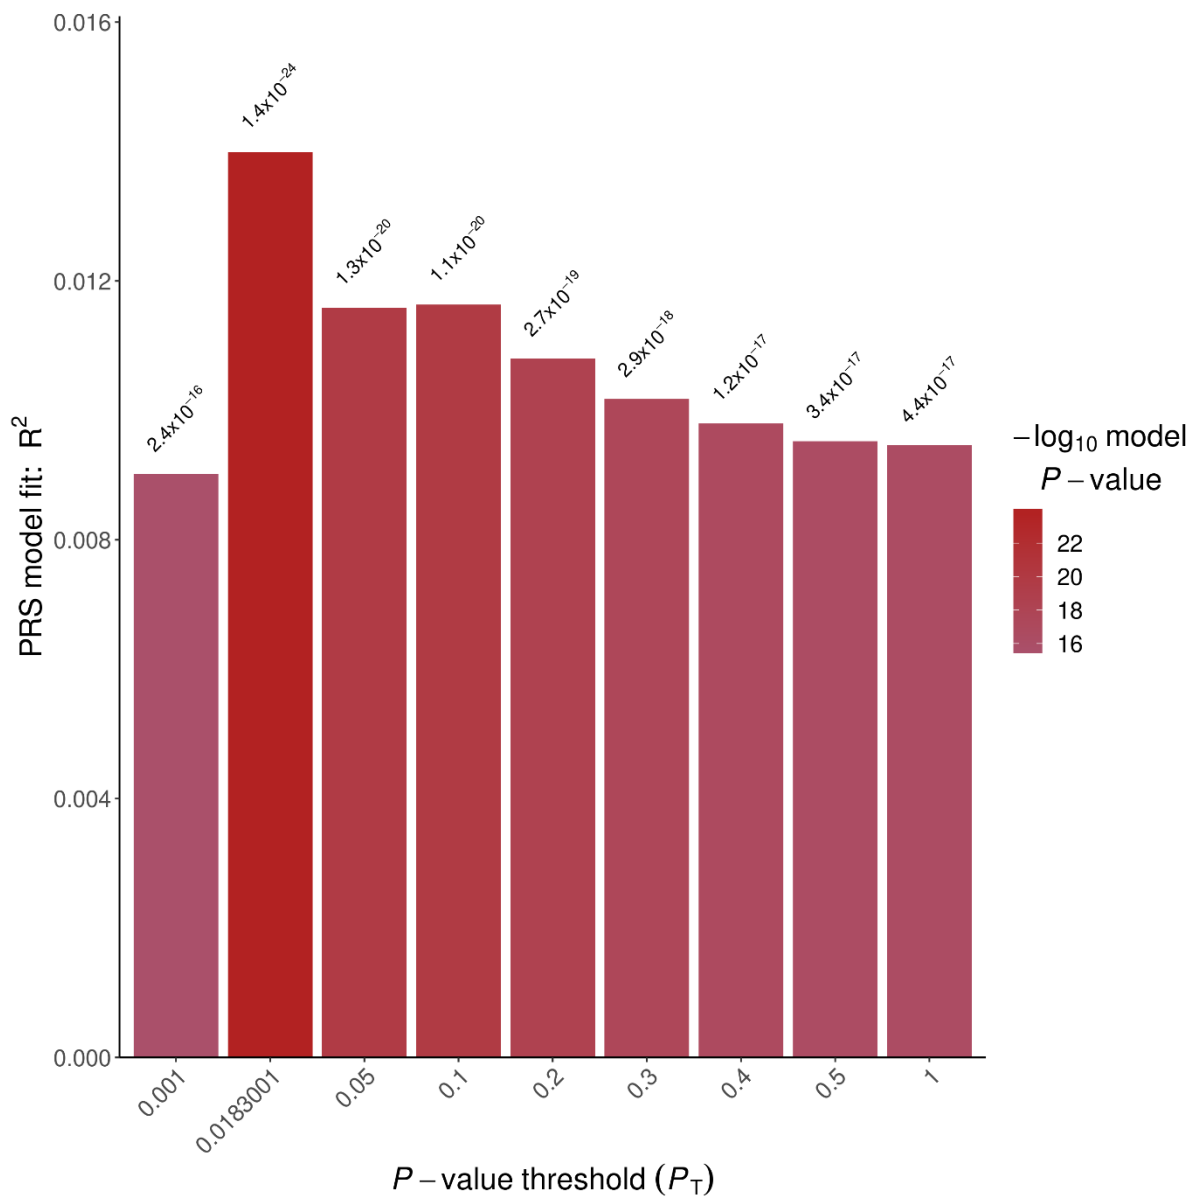

**Figure S1:** Proportion of variance of smoking initiation explained by PGS ( $R^2$ ) in the training sample ( $N=7,431$ ) for different  $P$ -value thresholds.  $P$ -value threshold = 0.0183001 generates the best-fit PGS with  $R^2 = 0.014$ .

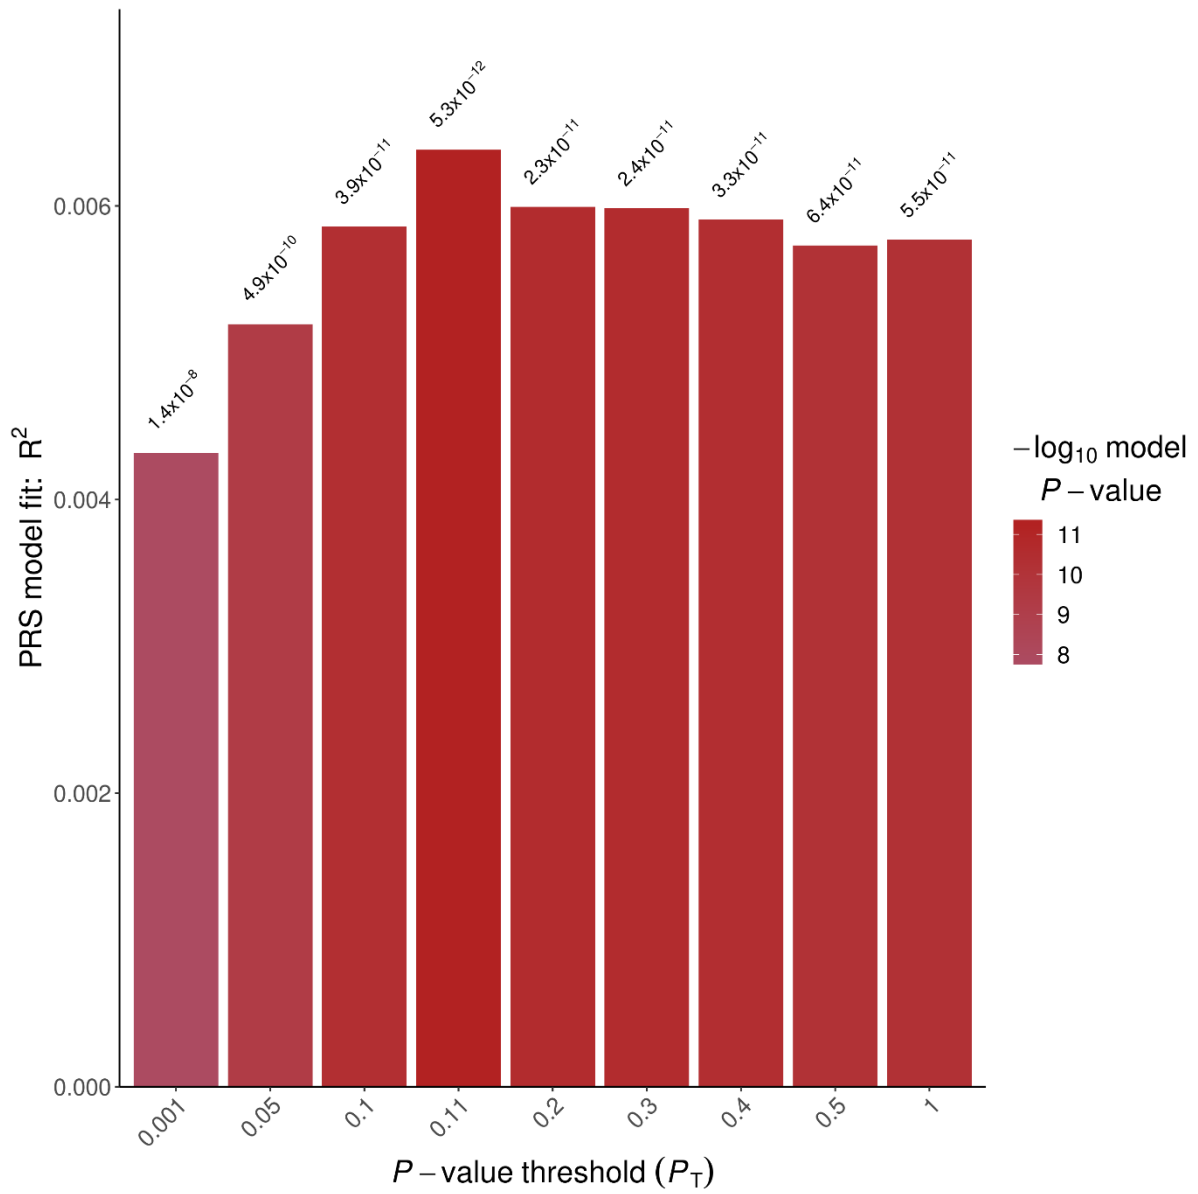

**Figure S2:** Proportion of variance of alcohol consumption last week explained by PGS ( $R^2$ ) in the training sample ( $N=7,431$ ) for different  $P$ -value thresholds.  $P$ -value threshold = 0.11 generates the best-fit PGS with  $R^2 = 0.0064$ .

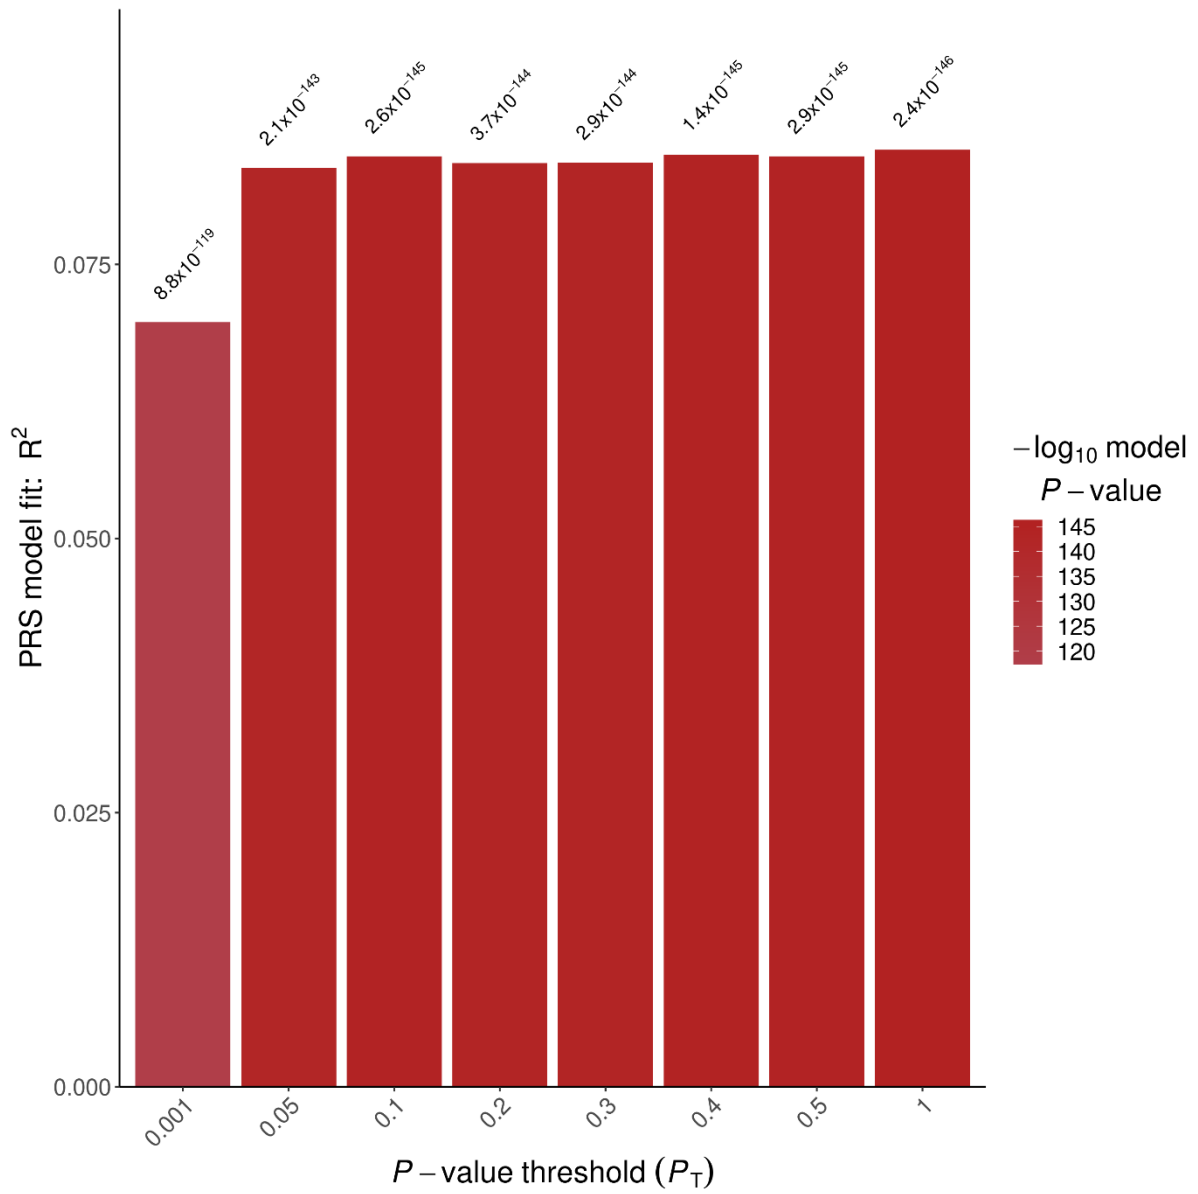

**Figure S3:** Proportion of variance of BMI explained by PGS ( $R^2$ ) in the training sample ( $N=7,431$ ) for different  $P$ -value thresholds.  $P$ -value threshold = 1 generates the best-fit PGS with  $R^2 = 0.0855$ .
